# Supplementary material for: Neural network-based pseudopotential: development of a transferable local pseudopotential
Source: Royal Society of Chemistry journal article supplement (doi:10.1039/d2cp01810a), 2022-01-01
Supplement: d2cp01810a2.pdf [file d2cp01810a2.pdf]

**Supplementary Information for:**  
**Neural network-based pseudopotential: development of a  
transferable local pseudopotential**

Jeheon Woo,<sup>†</sup> Hyeonsu Kim,<sup>†</sup> and Woo Youn Kim<sup>\*,†</sup>

<sup>†</sup>*Department of Chemistry, KAIST, Daejeon 34141, Republic of Korea*

\* Email: wooyoun@kaist.ac.kr

# 1 The parameters for NNLP optimization

For the sake of simplicity, we used the same set of many adjustable parameters for all elements.  $w_1$ ,  $w_3$ , and  $w_4$  were set to 100, 10, and 10 for all elements, respectively. Only  $r_c$ ,  $r_t$ ,  $d_{\max}$ , and  $w_2$  were set differently for each element.  $r_c$  was set as the radius at the outermost maximum of the valence wavefunctions of all-electron calculations, and the train radius  $r_t$  was chosen to be 0.5 bohr larger than  $r_c$ .  $w_2$  was optimized differently for each element to decrease the sum of errors in eigenvalues using the Bayesian optimization method.  $d_{\max}$  was used as 10 or 30 for all elements. The detailed values for  $r_c$ ,  $d_{\max}$ , and  $w_2$  are shown in Table S1.

Table S 1: Input parameters to generate the NNLP of each element.

| Element | $r_c$ (Å) | $d_{\max}$ | $w_2$   |
|---------|-----------|------------|---------|
| Li      | 3.1311    | 10         | 6.1640  |
| Be      | 2.0497    | 10         | 19.4152 |
| B       | 1.5629    | 10         | 19.3460 |
| C       | 1.1900    | 10         | 1.0000  |
| Na      | 3.2482    | 10         | 3.0989  |
| Mg      | 2.5171    | 10         | 13.3235 |
| Al      | 2.6407    | 10         | 18.5779 |
| Si      | 2.1403    | 10         | 35.0619 |
| P       | 1.8293    | 30         | 36.8689 |
| S       | 1.5959    | 30         | 36.8677 |
| Cl      | 1.4202    | 10         | 10.3095 |
| Ar      | 1.2887    | 10         | 1.0052  |
| K       | 4.0211    | 10         | 3.8104  |
| Ca      | 3.3343    | 10         | 5.0384  |
| Ga      | 2.5244    | 10         | 6.1550  |
| Ge      | 2.2040    | 10         | 6.2662  |
| As      | 1.9729    | 10         | 13.3238 |
| Se      | 1.7961    | 30         | 3.5700  |
| Br      | 1.6630    | 30         | 18.0291 |
| Kr      | 1.5411    | 10         | 12.2823 |

## 2 Effect of the unbound d-state on the accuracy in bulk property calculations

For elements with unbound d-states, the p-d coupling may be overestimated in bulk structures if the d-state is not properly considered. So, the reliable NCPPs of these elements should be generated such that the d-state becomes an unbound state. We generated NCPPs for Ga and Ge by considering only the s- and p-states like in the case of NNLP in this work. Here,  $r_c$  was set to the same value with that of NNLP for each element. And bulk properties were calculated by KS-DFT with these NCPPs (NCPP\* in Table S2), and compared the results with those of NNLP.

Table S 2: Bulk properties calculated by KS-DFT with NCPP, NCPP\*, and NNLP. LDA was used as the exchange-correlation functional.

| System          | PP    | $V_0$ ( $\text{\AA}^3$ ) | $B_0$ (GPa) | $B'_0$ | $E_c$ (eV) |
|-----------------|-------|--------------------------|-------------|--------|------------|
| Ga orthorhombic | NCPP  | 20.11                    | 53.1        | 5.21   | -3.178     |
|                 | NCPP* | 15.91                    | 86.8        | 4.78   | -3.993     |
|                 | NNLP  | 15.22                    | 90.3        | 4.92   | -4.057     |
| Ge diamond      | NCPP  | 23.20                    | 65.0        | 4.82   | -4.489     |
|                 | NCPP* | 20.78                    | 81.9        | 4.69   | -5.001     |
|                 | NNLP  | 20.88                    | 77.9        | 4.46   | -4.942     |

### 3 Electronic configuration test

To evaluate the transferability of NNLPs to other electronic configuration test, we performed atomic calculations for the following three electronic configurations: the ground, excited, and cationic states. The excited states were selected as the state in which one electron has transitioned from the s-state to the p-state. For Li and Na,  $2s^{0.5}2p^0$  and  $3s^{0.5}3p^0$  configurations were used as the cationic states, respectively, because they have only one valence electron in the ground state. For all evaluated elements, spin-unpolarized calculations were performed.

Table S 3: The eigenvalues and excitation energies for the three electronic configurations calculated by all-electron potential, NNLP, OEPP, and BLPS.

| Element | Configuration  |                 | AE (eV) | NNLP (eV) | OEPP (eV) | BLPS (eV) |
|---------|----------------|-----------------|---------|-----------|-----------|-----------|
| Li      | $2s^12p^0$     | $\varepsilon_0$ | -2.877  | -2.878    | -3.416    | -2.976    |
|         |                | $\varepsilon_1$ | -1.128  | -0.738    | -0.364    | -0.740    |
|         |                | $\Delta E$      | 0.000   | 0.000     | 0.000     | 0.000     |
|         | $2s^02p^1$     | $\varepsilon_0$ | -3.344  | -3.657    | -3.344    | -3.802    |
|         |                | $\varepsilon_1$ | -1.583  | -1.492    | -1.519    | -1.538    |
|         |                | $\Delta E$      | 1.754   | 2.173     | 3.398     | 2.283     |
|         | $2s^{0.5}2p^0$ | $\varepsilon_0$ | -5.322  | -5.288    | -6.549    | -5.445    |
|         |                | $\varepsilon_1$ | -3.364  | -2.662    | -2.387    | -2.660    |
|         |                | $\Delta E$      | 2.045   | 2.039     | 2.476     | 2.102     |
| Be      | $2s^22p^0$     | $\varepsilon_0$ | -5.606  | -5.598    | -6.018    | N/A       |
|         |                | $\varepsilon_1$ | -2.105  | -0.893    | -0.632    | N/A       |
|         |                | $\Delta E$      | 0.000   | 0.000     | 0.000     | N/A       |
|         | $2s^12p^1$     | $\varepsilon_0$ | -6.141  | -7.284    | -8.321    | N/A       |
|         |                | $\varepsilon_1$ | -2.604  | -2.018    | -1.927    | N/A       |
|         |                | $\Delta E$      | 3.519   | 4.984     | 5.909     | N/A       |
|         | $2s^12p^0$     | $\varepsilon_0$ | -13.647 | -13.578   | -14.795   | N/A       |
|         |                | $\varepsilon_1$ | -9.824  | -7.193    | -7.004    | N/A       |
|         |                | $\Delta E$      | 9.520   | 9.490     | 10.281    | N/A       |
| Na      | $3s^13p^0$     | $\varepsilon_0$ | -2.823  | -2.810    | -2.814    | N/A       |
|         |                | $\varepsilon_1$ | -0.774  | -0.777    | -0.786    | N/A       |
|         |                | $\Delta E$      | 0.000   | 0.000     | 0.000     | N/A       |
|         | $3s^03p^1$     | $\varepsilon_0$ | -3.698  | -3.733    | -3.728    | N/A       |
|         |                | $\varepsilon_1$ | -1.495  | -1.503    | -1.506    | N/A       |
|         |                | $\Delta E$      | 2.120   | 2.124     | 2.117     | N/A       |
|         | $3s^{0.5}3p^0$ | $\varepsilon_0$ | -5.217  | -5.224    | -5.224    | N/A       |
|         |                | $\varepsilon_1$ | -2.676  | -2.674    | -2.686    | N/A       |
|         |                | $\Delta E$      | 2.003   | 2.000     | 2.002     | N/A       |
| Mg      | $3s^23p^0$     | $\varepsilon_0$ | -4.787  | -4.805    | -4.821    | -4.806    |
|         |                | $\varepsilon_1$ | -1.377  | -1.372    | -1.267    | -1.338    |
|         |                | $\Delta E$      | 0.000   | 0.000     | 0.000     | 0.000     |
|         | $3s^13p^1$     | $\varepsilon_0$ | -5.770  | -5.784    | -5.920    | -5.832    |
|         |                | $\varepsilon_1$ | -2.129  | -2.135    | -2.087    | -2.123    |
|         |                | $\Delta E$      | 3.523   | 3.540     | 3.692     | 3.588     |
|         | $3s^13p^0$     | $\varepsilon_0$ | -11.527 | -11.467   | -11.597   | -11.498   |
|         |                | $\varepsilon_1$ | -7.164  | -7.085    | -6.953    | -7.023    |
|         |                | $\Delta E$      | 8.074   | 8.068     | 8.134     | 8.080     |

|    |                                 |                 |         |         |         |         |
|----|---------------------------------|-----------------|---------|---------|---------|---------|
| Al | 3s <sup>2</sup> 3p <sup>1</sup> | $\varepsilon_0$ | -7.836  | -8.056  | -8.084  | -8.197  |
|    |                                 | $\varepsilon_1$ | -2.789  | -2.785  | -2.639  | -2.707  |
|    |                                 | $\Delta E$      | 0.000   | 0.000   | 0.000   | 0.000   |
|    | 3s <sup>1</sup> 3p <sup>2</sup> | $\varepsilon_0$ | -8.669  | -8.955  | -9.085  | -9.182  |
|    |                                 | $\varepsilon_1$ | -3.411  | -3.444  | -3.337  | -3.402  |
|    |                                 | $\Delta E$      | 5.155   | 5.396   | 5.602   | 5.640   |
|    | 3s <sup>1</sup> 3p <sup>1</sup> | $\varepsilon_0$ | -15.724 | -15.931 | -16.022 | -16.192 |
|    |                                 | $\varepsilon_1$ | -9.849  | -9.757  | -9.556  | -9.700  |
|    |                                 | $\Delta E$      | 11.666  | 11.892  | 11.942  | 12.085  |
| Si | 3s <sup>2</sup> 3p <sup>2</sup> | $\varepsilon_0$ | -10.884 | -11.505 | -11.838 | -11.892 |
|    |                                 | $\varepsilon_1$ | -4.169  | -4.167  | -3.881  | -4.081  |
|    |                                 | $\Delta E$      | 0.000   | 0.000   | 0.000   | 0.000   |
|    | 3s <sup>1</sup> 3p <sup>3</sup> | $\varepsilon_0$ | -11.639 | -12.390 | -12.924 | -12.892 |
|    |                                 | $\varepsilon_1$ | -4.746  | -4.810  | -4.596  | -4.774  |
|    |                                 | $\Delta E$      | 6.807   | 7.462   | 8.148   | 7.969   |
|    | 3s <sup>2</sup> 3p <sup>1</sup> | $\varepsilon_0$ | -19.109 | -19.647 | -19.871 | -20.073 |
|    |                                 | $\varepsilon_1$ | -11.753 | -11.581 | -11.073 | -11.464 |
|    |                                 | $\Delta E$      | 7.829   | 7.758   | 7.354   | 7.653   |
| P  | 3s <sup>2</sup> 3p <sup>3</sup> | $\varepsilon_0$ | -14.021 | -15.142 | -16.159 | -15.649 |
|    |                                 | $\varepsilon_1$ | -5.603  | -5.598  | -5.177  | -5.483  |
|    |                                 | $\Delta E$      | 0.000   | 0.000   | 0.000   | 0.000   |
|    | 3s <sup>1</sup> 3p <sup>4</sup> | $\varepsilon_0$ | -14.728 | -16.022 | -17.366 | -16.676 |
|    |                                 | $\varepsilon_1$ | -6.157  | -6.243  | -5.933  | -6.184  |
|    |                                 | $\Delta E$      | 8.496   | 9.665   | 11.212  | 10.332  |
|    | 3s <sup>2</sup> 3p <sup>2</sup> | $\varepsilon_0$ | -23.325 | -24.378 | -25.275 | -24.834 |
|    |                                 | $\varepsilon_1$ | -14.306 | -14.119 | -13.415 | -13.874 |
|    |                                 | $\Delta E$      | 9.821   | 9.738   | 9.169   | 9.559   |
| S  | 3s <sup>2</sup> 3p <sup>4</sup> | $\varepsilon_0$ | -17.284 | -19.170 | -21.006 | N/A     |
|    |                                 | $\varepsilon_1$ | -7.112  | -6.836  | -6.561  | N/A     |
|    |                                 | $\Delta E$      | 0.000   | 0.000   | 0.000   | N/A     |
|    | 3s <sup>1</sup> 3p <sup>5</sup> | $\varepsilon_0$ | -17.959 | -20.171 | -22.327 | N/A     |
|    |                                 | $\varepsilon_1$ | -7.653  | -7.529  | -7.361  | N/A     |
|    |                                 | $\Delta E$      | 10.240  | 12.490  | 14.710  | N/A     |
|    | 3s <sup>2</sup> 3p <sup>3</sup> | $\varepsilon_0$ | -27.633 | -29.260 | -31.199 | N/A     |
|    |                                 | $\varepsilon_1$ | -16.884 | -16.152 | -15.834 | N/A     |
|    |                                 | $\Delta E$      | 11.863  | 11.372  | 11.067  | N/A     |
| Ca | 4s <sup>2</sup> 4p <sup>0</sup> | $\varepsilon_0$ | -3.869  | -3.759  | -3.781  | N/A     |
|    |                                 | $\varepsilon_1$ | -1.441  | -1.601  | -1.662  | N/A     |
|    |                                 | $\Delta E$      | 0.000   | 0.000   | 0.000   | N/A     |
|    | 4s <sup>1</sup> 4p <sup>1</sup> | $\varepsilon_0$ | -4.548  | -4.359  | -4.333  | N/A     |
|    |                                 | $\varepsilon_1$ | -1.989  | -2.073  | -2.109  | N/A     |
|    |                                 | $\Delta E$      | 2.491   | 2.219   | 2.170   | N/A     |
|    | 4s <sup>1</sup> 4p <sup>0</sup> | $\varepsilon_0$ | -9.175  | -9.031  | -9.023  | N/A     |
|    |                                 | $\varepsilon_1$ | -6.066  | -6.249  | -6.341  | N/A     |
|    |                                 | $\Delta E$      | 6.463   | 6.327   | 6.339   | N/A     |

|    |                                 |                 |         |         |         |         |
|----|---------------------------------|-----------------|---------|---------|---------|---------|
| Ga | 4s <sup>2</sup> 4p <sup>1</sup> | $\varepsilon_0$ | -9.174  | -9.155  | -9.158  | -8.911  |
|    |                                 | $\varepsilon_1$ | -2.738  | -2.744  | -2.698  | -2.671  |
|    |                                 | $\Delta E$      | 0.000   | 0.000   | 0.000   | 0.000   |
|    | 4s <sup>1</sup> 4p <sup>2</sup> | $\varepsilon_0$ | -10.280 | -10.394 | -10.331 | -10.010 |
|    |                                 | $\varepsilon_1$ | -3.500  | -3.532  | -3.490  | -3.435  |
|    |                                 | $\Delta E$      | 6.613   | 6.639   | 6.658   | 6.414   |
|    | 4s <sup>1</sup> 4p <sup>1</sup> | $\varepsilon_0$ | -17.753 | -17.988 | -17.795 | -17.416 |
|    |                                 | $\varepsilon_1$ | -10.200 | -10.293 | -10.136 | -10.063 |
|    |                                 | $\Delta E$      | 13.338  | 13.427  | 13.354  | 13.042  |
| As | 4s <sup>2</sup> 4p <sup>3</sup> | $\varepsilon_0$ | -14.703 | -14.681 | -14.886 | -14.721 |
|    |                                 | $\varepsilon_1$ | -5.347  | -5.343  | -5.298  | -5.311  |
|    |                                 | $\Delta E$      | 0.000   | 0.000   | 0.000   | 0.000   |
|    | 4s <sup>1</sup> 4p <sup>4</sup> | $\varepsilon_0$ | -15.587 | -15.700 | -15.879 | -15.669 |
|    |                                 | $\varepsilon_1$ | -5.980  | -6.004  | -5.972  | -5.969  |
|    |                                 | $\Delta E$      | 9.483   | 9.517   | 9.751   | 9.558   |
|    | 4s <sup>2</sup> 4p <sup>2</sup> | $\varepsilon_0$ | -23.607 | -23.555 | -23.776 | -23.627 |
|    |                                 | $\varepsilon_1$ | -13.545 | -13.473 | -13.424 | -13.476 |
|    |                                 | $\Delta E$      | 9.325   | 9.292   | 9.245   | 9.277   |
| Se | 4s <sup>2</sup> 4p <sup>4</sup> | $\varepsilon_0$ | -17.485 | -17.480 | -17.574 | N/A     |
|    |                                 | $\varepsilon_1$ | -6.661  | -6.688  | -6.674  | N/A     |
|    |                                 | $\Delta E$      | 0.000   | 0.000   | 0.000   | N/A     |
|    | 4s <sup>1</sup> 4p <sup>5</sup> | $\varepsilon_0$ | -18.318 | -18.421 | -18.469 | N/A     |
|    |                                 | $\varepsilon_1$ | -7.268  | -7.319  | -7.306  | N/A     |
|    |                                 | $\Delta E$      | 10.939  | 10.947  | 11.033  | N/A     |
|    | 4s <sup>2</sup> 4p <sup>3</sup> | $\varepsilon_0$ | -27.081 | -27.065 | -27.181 | N/A     |
|    |                                 | $\varepsilon_1$ | -15.589 | -15.575 | -15.582 | N/A     |
|    |                                 | $\Delta E$      | 11.009  | 11.021  | 11.017  | N/A     |
| Br | 4s <sup>2</sup> 4p <sup>5</sup> | $\varepsilon_0$ | -20.322 | -20.487 | -20.725 | N/A     |
|    |                                 | $\varepsilon_1$ | -8.007  | -8.020  | -7.979  | N/A     |
|    |                                 | $\Delta E$      | 0.000   | 0.000   | 0.000   | N/A     |
|    | 4s <sup>1</sup> 4p <sup>6</sup> | $\varepsilon_0$ | -21.118 | -21.418 | -21.637 | N/A     |
|    |                                 | $\varepsilon_1$ | -8.598  | -8.646  | -8.615  | N/A     |
|    |                                 | $\Delta E$      | 12.418  | 12.620  | 12.886  | N/A     |
|    | 4s <sup>2</sup> 4p <sup>4</sup> | $\varepsilon_0$ | -30.592 | -30.736 | -31.001 | N/A     |
|    |                                 | $\varepsilon_1$ | -17.636 | -17.583 | -17.557 | N/A     |
|    |                                 | $\Delta E$      | 12.708  | 12.694  | 12.660  | N/A     |

## 4 Bulk calculations

### 4.1 Correlation between norm error and transferability

In order to confirm the correlation between the norm error and transferability, we plot the relative errors of the bulk properties of several elements with respect to the norm errors in Fig. S1. The norm error and each error of bulk properties are calculated as

$$\begin{aligned} \Delta N_{nc} &= \left[ \frac{\int_0^{r_c} (|\phi_0(r)|^2 - |\psi_0(r)|^2) dr}{\int_0^{r_c} |\psi_0(r)|^2 dr} + \frac{\int_0^{r_c} (|\phi_1(r)|^2 - |\psi_1(r)|^2) dr}{\int_0^{r_c} |\psi_1(r)|^2 dr} \right] \times \frac{100}{2}, \\ \Delta V_0 &= \frac{|V_0^{\text{NCPP}} - V_0^{\text{NNLP}}|}{V_0^{\text{NCPP}}} \times 100, \\ \Delta B_0 &= \frac{|B_0^{\text{NCPP}} - B_0^{\text{NNLP}}|}{B_0^{\text{NCPP}}} \times 100, \\ \Delta E_c &= \frac{|E_c^{\text{NCPP}} - E_c^{\text{NNLP}}|}{E_c^{\text{NCPP}}} \times 100. \end{aligned} \tag{1}$$

In eqn (1),  $\psi_l$  and  $\phi_l$  are the wavefunctions obtained from all-electron calculations and KS-DFT calculations with NNLP, respectively, and  $V_0$ ,  $B_0$ , and  $E_c$  are the equilibrium volumes, bulk modulus, and cohesive energy calculated by KS-DFT with NCPP and NNLP, respectively. The calculated systems are Li BCC, Be HCP, C diamond, Na BCC, Mg HCP, Al FCC, Si diamond, P orthorhombic, Ar FCC, K BCC, Ca FCC, Ga orthorhombic, Ge diamond, As trigonal, Se trigonal, Br orthorhombic, and Kr FCC.

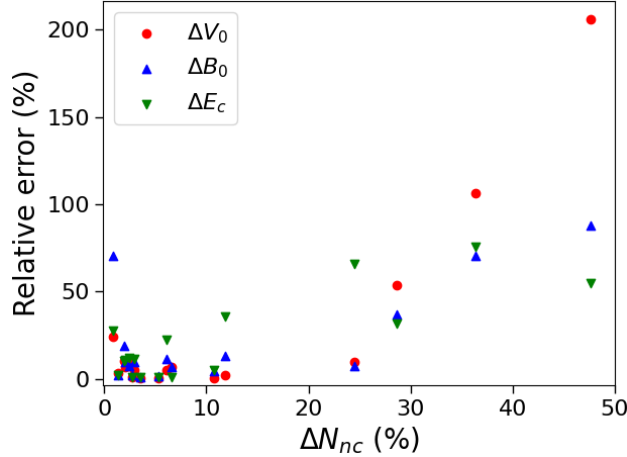

Figure S 1: The relative errors of the bulk properties of several elements with respect to the corresponding norm errors in atomic calculations. The calculated bulk properties are the equilibrium volume  $V_0$ , the bulk modulus  $B_0$ , and the cohesive energy  $E_c$ . The results were calculated by KS-DFT calculations with NCPP and NNLP. The results of NCPP were regarded as the reference. LDA was used as the exchange-correlation functional.

## 4.2 Band structure calculations

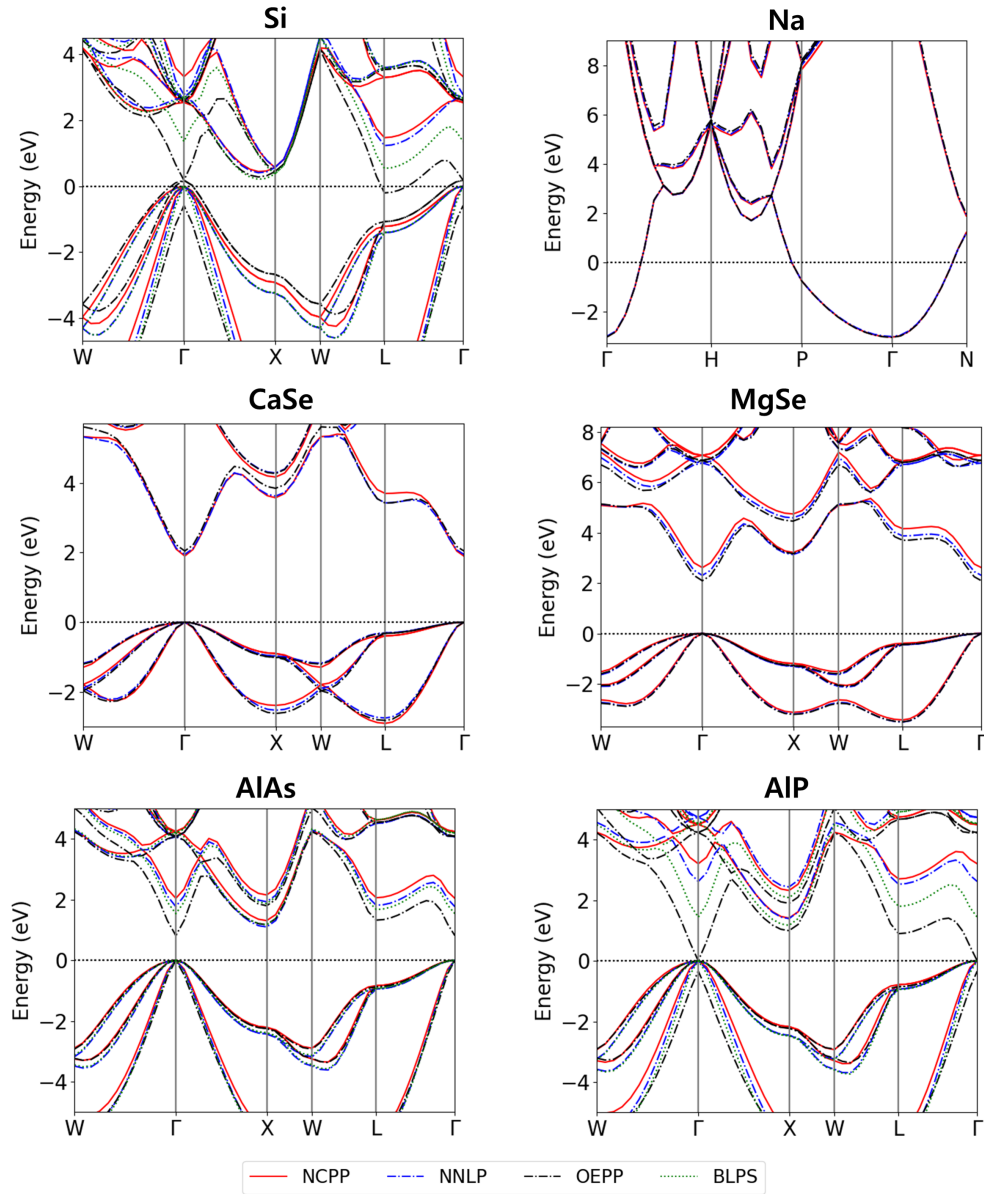

Figure S 2: The band structures of the Si diamond, Na BCC, CaSe RS, MgSe ZB, AlAs ZB, and AlP ZB calculated using KS-DFT with NCPP (red), NNLP (blue), OEPP (black), and BLPS (green). LDA was used as the exchange-correlation functional. The energy (y-axis) is the relative to the Fermi energy.



## 5 Effect of the cutoff radius on the accuracy in atomic calculations

To test the effect of the cutoff radius  $r_c$  on the accuracy in atomic calculations, we generated NNLPs for S with different  $r_c$  values (1.1959–2.1959 bohr at the interval of 0.1 bohr). All adjustable parameters to obtain the NNLPs were used as described in Section 1 except for  $r_c$  and  $w_2$ . Each  $w_2$  corresponding to the NNLP at the given  $r_c$  was optimized by the Bayesian optimization method. We performed atomic calculations using these NNLPs and calculated the errors in eigenvalues as defined in eq (12) in the main text.

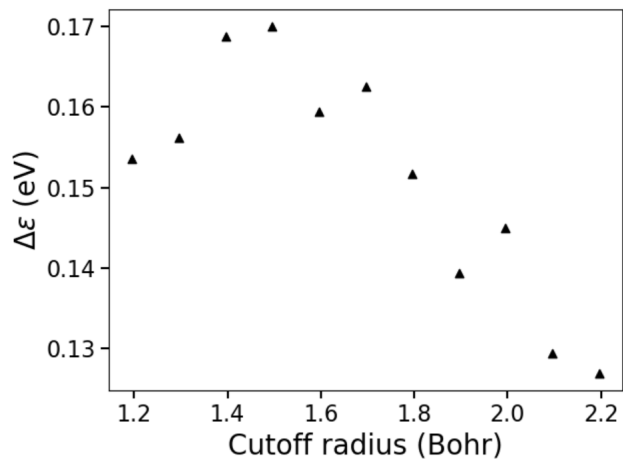

Figure S 3: The errors in eigenvalues as a function the cutoff radius. The results were calculated by KS-DFT with NNLPs of S generated with different cutoff radii. LDA was used as the exchange-correlation functional.
